# Supplementary material for: Long Working Hours and the Risk of Glucose Intolerance: A Cohort Study
Source: MDPI journal article supplement (doi:10.3390/ijerph191811831), 2022-09-19
Supplement: s1 [file s1]

**Table S1.** Incidence and risk of glucose intolerance according to weekly working hours including participants who changed group of working hours during follow-up

| Weekly working hours | Person-years (PY) | Incident cases | Incidence density (per 100 PY) (95% CI) | Age-adjusted HR (95% CI) | Multivariable-adjusted HR (95% CI) <sup>a</sup> |                   |                   |
|----------------------|-------------------|----------------|-----------------------------------------|--------------------------|-------------------------------------------------|-------------------|-------------------|
|                      |                   |                |                                         |                          | Model 1*                                        | Model 2**         | Model 3***        |
| 35-40                | 38,491.8          | 2,075          | 5.39 (5.16-5.63)                        | 1.00 (reference)         | 1.00 (reference)                                | 1.00 (reference)  | 1.00 (reference)  |
| 41-52                | 150,289.8         | 7,510          | 5.00 (4.89-5.11)                        | 1.07 (1.02-1.13)         | 1.06 (1.00-1.12)                                | 1.06 (0.99-1.13)  | 1.05 (0.99-1.12)  |
| >52                  | 84,120.1          | 4,306          | 5.12 (4.97-5.27)                        | 1.11 (1.06-1.18)         | 1.10 (1.04-1.17)                                | 1.08 (1.01-1.15)  | 1.07 (1.00-1.14)  |
| per 1 hour           |                   |                |                                         | 1.003 (1.001-1.004)      | 1.003 (1.001-1.01)                              | 1.00 (1.00-1.004) | 1.00 (1.00-1.004) |
| <i>P</i> for trend   |                   |                |                                         | <0.001                   | 0.002                                           | 0.052             | 0.088             |

<sup>a</sup> Estimated from Cox proportional hazard models. \* Model 1 was adjusted for age, alcohol intake, smoking status, regular exercise, education level, marital status, and household income. \*\* Model 2: model 1 plus adjustment for medication for hypertension, medication for dyslipidemia, BMI, HOMA-IR, and hsCRP. \*\*\* Model 3: model 2 plus adjustment for shift work schedule. HR, hazard ratio; CI, confidence interval; BMI, body mass index; HOMA-IR, homeostasis model assessment of insulin resistance; hsCRP, high-sensitivity C-reactive protein
